# Supplementary material
Source: publisher site journal article supplement (https://www.dovepress.com/get_supplementary_file.php?f=295814T2.xlsx)
Supplement: Supplementary file 1 [file get_supplementary_file.php]

## Sheet: Sheet1
	Supplementary Table 2. LINC01268 related genes
	Gene Symbol	Gene ID	pearson correlation coefficient
	PNISR	ENSG00000132424.14	0.61
	LINC00648	ENSG00000259129.5	0.61
	LINC01355	ENSG00000261326.2	0.59
	INTU	ENSG00000164066.12	0.59
	RP3-509I19.11	ENSG00000279968.1	0.59
	CTD-2008L17.2	ENSG00000206129.3	0.58
	RP11-776H12.1	ENSG00000226476.2	0.57
	RP11-60A14.1	ENSG00000279778.1	0.56
	ZGRF1	ENSG00000138658.15	0.56
	COL24A1	ENSG00000171502.14	0.56
	CFAP44	ENSG00000206530.8	0.56
	FOXD2-AS1	ENSG00000237424.1	0.55
	MANEA-AS1	ENSG00000261366.1	0.55
	RP11-486G15.2	ENSG00000271576.1	0.55
	CCDC18	ENSG00000122483.17	0.55
	TBX19	ENSG00000143178.12	0.54
	RP11-87H9.4	ENSG00000280077.1	0.54
	AC069277.2	ENSG00000189229.10	0.54
	AK9	ENSG00000155085.15	0.53
	EEF1A1P14	ENSG00000233057.1	0.53
	RP11-412D9.4	ENSG00000260329.1	0.52
	MAP3K7	ENSG00000135341.17	0.52
	RBM5	ENSG00000003756.16	0.52
	RP11-248G5.8	ENSG00000217576.7	0.52
	RP11-496H1.1	ENSG00000249626.1	0.52
	ZNF230	ENSG00000159882.12	0.52
	ACTBP8	ENSG00000220267.1	0.52
	RP11-364B6.1	ENSG00000215869.3	0.52
	AC104389.28	ENSG00000167355.7	0.52
	TBC1D32	ENSG00000146350.13	0.52
	AC013401.2	ENSG00000232227.5	0.51
	RP11-206L10.1	ENSG00000224956.5	0.51
	RP11-230C9.2	ENSG00000271551.2	0.51
	RP1-286D6.5	ENSG00000272153.1	0.51
	CARD18	ENSG00000255501.1	0.51
	EME1	ENSG00000154920.14	0.51
	C1orf52	ENSG00000162642.13	0.51
	CEP162	ENSG00000135315.11	0.51
	RP11-435F17.3	ENSG00000241889.1	0.51
	CCDC14	ENSG00000175455.14	0.51
	AL078471.5	ENSG00000273840.1	0.51
	GRIA2	ENSG00000120251.18	0.51
	MED23	ENSG00000112282.17	0.51
	SGK494	ENSG00000167524.14	0.51
	RP11-364B6.2	ENSG00000243500.1	0.51
	RP11-64C12.3	ENSG00000267733.5	0.51
	RP4-570O12.3	ENSG00000279565.1	0.50
	RP11-722M1.1	ENSG00000248215.5	0.50
	AC074289.1	ENSG00000225889.7	0.50
	RP11-397A16.1	ENSG00000267284.1	0.50
	RP11-65L3.2	ENSG00000270277.1	0.50
	TCTE3	ENSG00000184786.5	0.50
	AC024937.6	ENSG00000231443.2	0.50
	RP11-555K2.4	ENSG00000279321.1	0.50
	ZNF644	ENSG00000122482.20	0.50
	RP11-309H21.3	ENSG00000261642.1	0.50
	RP11-478J18.2	ENSG00000274895.1	0.50
	TPTE	ENSG00000274391.4	0.50
	KNTC1	ENSG00000184445.11	0.50
	RNF2P1	ENSG00000231381.2	0.50
	RP11-314N14.1	ENSG00000250102.5	0.49
	RP11-471M2.3	ENSG00000272046.1	0.49
	KLHL17	ENSG00000187961.13	0.49
	ATAD5	ENSG00000176208.8	0.49
	EFTUD1P2	ENSG00000248998.2	0.49
	FANCL	ENSG00000115392.11	0.49
	RPL18AP8	ENSG00000218754.4	0.49
	PPP1R2P10	ENSG00000213232.2	0.49
	LINC01001	ENSG00000230724.9	0.49
	RP11-91I8.2	ENSG00000279479.1	0.49
	RP5-991G20.6	ENSG00000279206.1	0.49
	POLQ	ENSG00000051341.13	0.49
	RP11-408A13.4	ENSG00000272871.1	0.49
	RP5-1074L1.4	ENSG00000273373.1	0.49
	EGFEM1P	ENSG00000206120.11	0.49
	WI2-2118C23.2	ENSG00000276520.1	0.49
	WDR27	ENSG00000184465.15	0.49
	PES1P1	ENSG00000248191.1	0.49
	RP11-64C12.4	ENSG00000267643.1	0.49
	FAM230C	ENSG00000279516.1	0.49
	ZUFSP	ENSG00000153975.9	0.49
	PHACTR4	ENSG00000204138.12	0.48
	HERC2P3	ENSG00000180229.12	0.48
	RP13-104F24.2	ENSG00000215769.8	0.48
	OR51B4	ENSG00000183251.3	0.48
	RP11-734K2.4	ENSG00000270344.2	0.48
	RP11-764K9.4	ENSG00000215548.2	0.48
	AC011290.5	ENSG00000236015.1	0.48
	AP003900.6	ENSG00000277693.1	0.48
	ADAT2	ENSG00000189007.15	0.48
	KPNA5	ENSG00000196911.9	0.48
	RP1-39G22.7	ENSG00000259943.1	0.48
	FAM111A	ENSG00000166801.15	0.48
	AKAP8P1	ENSG00000234146.1	0.48
	NKTR	ENSG00000114857.17	0.48
	LLNLF-173C4.1	ENSG00000282051.1	0.48
	AC016582.2	ENSG00000225868.6	0.48
	PTOV1-AS2	ENSG00000269352.1	0.48
	SLC25A5P1	ENSG00000215347.3	0.48
	L3MBTL1	ENSG00000185513.14	0.48
